# Supplementary material for: Application of Mass Spectrometry for Determining the Geographic Production Area of Wagyu Beef
Source: MDPI journal article supplement (doi:10.3390/metabo12090777), 2022-08-23
Supplement: s1 [file s1]

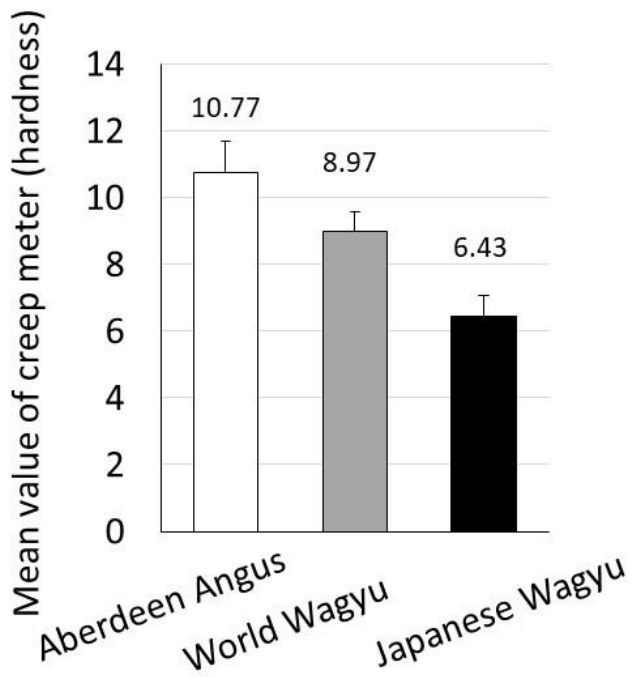

**Figure S1.** Comparison of beef hardness using a creep meter.

Beef (semimembranous muscle) was cut into 2-cm-thick pieces and cooked in hot water at 70°C for 20 min. Beef hardness was measured using a creep meter (Yamaden Co., Ltd.). The measurement conditions were as follows: the hardness was defined as the maximum load generated when the plunger (3-mm diameter cylinder) was inserted 15-mm deep into the meat.

Ascending speed of the specimen stand: 1 mm/s

Data represented as the mean  $\pm$  standard deviation ( $n = 3$ ).

| (pmol/mg)           |          |       |              | (pmol/mg)               |         |       |               |
|---------------------|----------|-------|--------------|-------------------------|---------|-------|---------------|
| Phosphatidylcholine | Mean     | SD    | % of all PCs | Lysophosphatidylcholine | Mean    | SD    | % of all LPCs |
| PC(C16:0/C18:1)     | 1231.4 ± | 274.2 | 38.3         | LPC(C18:2)              | 499.9 ± | 162.8 | 36.9          |
| PC(C16:1/C18:1)     | 571.7 ±  | 113.4 | 17.8         | LPC(C18:1)              | 463.2 ± | 196.7 | 34.2          |
| PC(C18:1/C18:1)     | 233.4 ±  | 22.8  | 7.3          | LPC(C20:4)              | 171.8 ± | 35.4  | 12.7          |
| PC(C18:1/C18:2)     | 130.5 ±  | 24.3  | 4.1          | LPC(C20:3)              | 70.6 ±  | 14.2  | 5.2           |
| PC(C18:0/C18:1)     | 120.1 ±  | 24.2  | 3.7          | LPC(C16:0)              | 37.3 ±  | 19.4  | 2.8           |
| PC(C16:0/C16:1)     | 108.6 ±  | 37.8  | 3.4          | LPC(C22:4)              | 32.6 ±  | 12.1  | 2.4           |
| PC(C16:0/C20:4)     | 81.6 ±   | 20.0  | 2.5          | LPC(C16:1)              | 25.7 ±  | 14.8  | 1.9           |
| PC(C18:0/C17:0)     | 76.0 ±   | 57.6  | 2.4          | LPC(C22:5)              | 23.4 ±  | 4.8   | 1.7           |
| PC(C16:1e/C18:2)    | 73.8 ±   | 50.6  | 2.3          | LPC(C18:3)              | 21.6 ±  | 4.1   | 1.6           |
| PC(C16:1e/C20:3)    | 65.3 ±   | 28.2  | 2.0          | LPC(C17:1)              | 10.1 ±  | 6.4   | 0.7           |

  

| (pmol/mg)       |         |       |              | (pmol/mg)                    |         |      |               |
|-----------------|---------|-------|--------------|------------------------------|---------|------|---------------|
| Diglyceride     | Mean    | SD    | % of all DGs | Lysophosphatidylethanolamine | Mean    | SD   | % of all LPEs |
| DG(C16:0/C18:1) | 403.1 ± | 692.7 | 33.46        | LPE(C20:4)                   | 204.0 ± | 31.4 | 32.4          |
| DG(C18:1/C18:1) | 301.8 ± | 563.5 | 25.06        | LPE(C18:2)                   | 172.1 ± | 59.8 | 27.4          |
| DG(C16:1/C18:1) | 100.6 ± | 152.5 | 8.35         | LPE(C18:1)                   | 94.2 ±  | 57.5 | 15.0          |
| DG(C18:0/C18:1) | 97.7 ±  | 174.6 | 8.11         | LPE(C20:3)                   | 60.9 ±  | 13.7 | 9.7           |
| DG(C18:1/C14:0) | 88.7 ±  | 137.3 | 7.36         | LPE(C22:4)                   | 45.4 ±  | 18.6 | 7.2           |
| DG(C16:0/C16:0) | 40.8 ±  | 63.5  | 3.39         | LPE(C22:5)                   | 29.7 ±  | 4.7  | 4.7           |
| DG(C18:1/C18:2) | 32.9 ±  | 53.4  | 2.73         | LPE(C20:5)                   | 7.5 ±   | 1.0  | 1.2           |
| DG(C16:0/C14:0) | 22.7 ±  | 30.5  | 1.88         | LPE(C18:3)                   | 5.7 ±   | 1.5  | 0.9           |
| DG(C16:0/C14:1) | 21.6 ±  | 27.2  | 1.79         | LPE(C18:0)                   | 4.7 ±   | 2.4  | 0.8           |
| DG(C18:1/C14:1) | 19.7 ±  | 29.7  | 1.64         | LPE(C15:0)                   | 4.6 ±   | 1.5  | 0.7           |

**Figure S2.** Top 10 lipid molecular species of phosphatidylcholine, lysophosphatidylcholine, diglyceride, and lysophosphatidylethanolamine in Wagyu beef detected via liquid chromatography–tandem mass spectrometry.

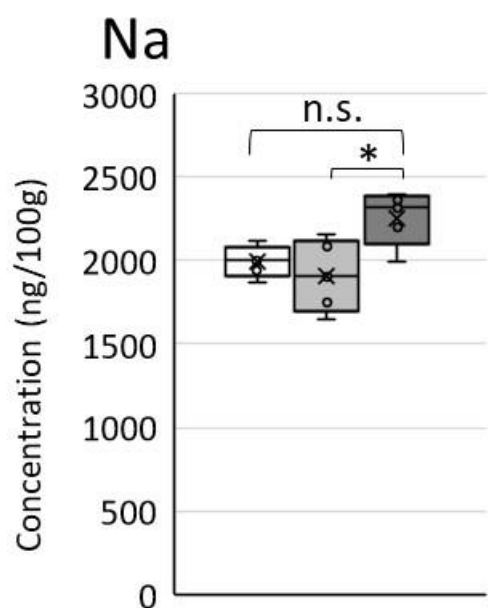

**Figure S3.** Comparison of sodium ions in Wagyu beef by elemental analysis. Inductively coupled plasma optical emission spectrometry and mass spectroscopy were used to detect elements in beef. Samples were obtained from rib-eye areas of the longissimus thoracis muscle (five Australian, Hybrid, and Japanese Wagyu each). The box plot presents the exclusive median and all plots, including outliers. The cross marks indicate the mean ( $n = 5$ ). Significant differences are presented as follows: \*  $p < 0.05$

n.s., not significant

Tukey's test; Australian vs. Hybrid vs. Japanese Wagyu

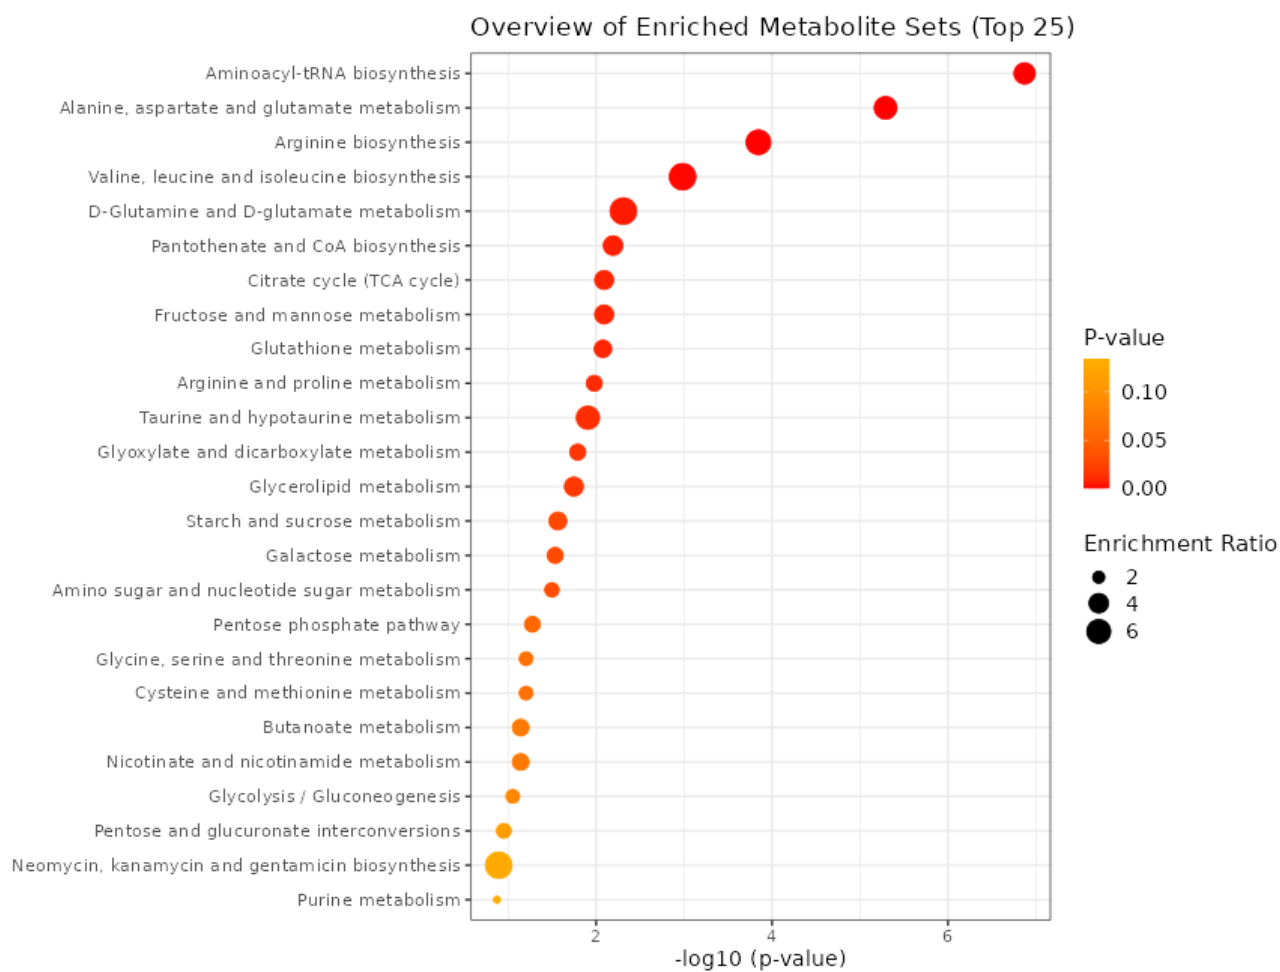

**Figure S4.** Results of metabolomics data by gas chromatography–mass spectrometry. Using the Kyoto Encyclopedia of Genes and Genomes pathway database (<http://www.genome.jp/kegg/>), we identified the metabolic pathways showing marked differences between Japanese and Australian Wagyu cattle.

| Plasma conditions     | ICP-MS     | ICP-OES    |
|-----------------------|------------|------------|
| RF Power              | 1.3 kW     | 1.20 kW    |
| Plasma gas flow       | 15.5 L/min | 15.0 L/min |
| Auxiliary gas flow    | 1.55 L/min | 1.50 L/min |
| Neplizer-gas flow     | 0.95 L/min | -          |
| Neplizer-gas pressure | -          | 200 kPa    |
| Pump speed            | 5 rpm      | 15 rpm     |

  

| Element           | ICP-MS<br>Mass-to-charge<br>ratio (m/z) | ICP-OES<br>Wavelength<br>(nm) |
|-------------------|-----------------------------------------|-------------------------------|
| Li                | 7                                       |                               |
| Co                | 59                                      |                               |
| Cu                | 65                                      |                               |
| Rb                | 85                                      |                               |
| Y                 | 89                                      |                               |
| Mo                | 98                                      |                               |
| Ag                | 107                                     |                               |
| Cd                | 111                                     |                               |
| Cs                | 133                                     |                               |
| Tl                | 203                                     |                               |
| Internal Standard | 115                                     |                               |
| Na                |                                         | 589.592                       |
| Mg                |                                         | 285.213                       |
| P                 |                                         | 213.618                       |
| K                 |                                         | 766.491                       |
| Ca                |                                         | 317.933                       |
| Mn                |                                         | 257.610                       |
| Fe                |                                         | 238.204                       |
| Zn                |                                         | 213.857                       |
| Sr                |                                         | 407.771                       |
| Ba                |                                         | 455.403                       |

**Figure S5.** Summary of analytical instrument conditions and elemental references for inductively coupled plasma optical emission spectrometry (ICP-MS) and inductively coupled plasma mass spectroscopy (ICP-OES).

Elemental concentrations were measured by the standard internal method using ICP-MS and ICP-OES under the measurement conditions presented in the table. As appropriate, mixed standard solutions for calibration curves were prepared by diluting single-element standard solutions (for ICP analysis). Each sample was assayed twice.
